# Supplementary material for: Optical, third order non-linear optical and electrochemical properties of dipolar, centrosymmetric andC2vorganoimido polyoxometalate derivatives
Source: Royal Society of Chemistry journal article supplement (doi:10.1039/d0cp06610a), 2021-01-01
Supplement: d0cp06610a1.pdf [file d0cp06610a1.pdf]

*Electronic Supplementary Information For:*

## **Optical, Third Order Non-Linear Optical and Electrochemical Properties of Dipolar, Centrosymmetric and C<sub>2v</sub> Organoimido Polyoxometalate Derivatives**

Ahmed Al-Yasari,<sup>a,b</sup> Hani El Moll,<sup>a,c</sup> Ryan Purdy,<sup>a</sup> Kevin Vincent,<sup>a</sup> Philip Spence,<sup>a</sup> Jean-Pierre Malval<sup>d</sup> and John Fielden<sup>\*a</sup>

### **1. Syntheses**

**Synthesis of (n-Bu<sub>4</sub>N)<sub>4</sub>[1,4-(Mo<sub>6</sub>O<sub>18</sub>N)<sub>2</sub>C<sub>6</sub>H<sub>4</sub>] (4).** A mixture of DCC (1,3-dicyclohexylcarbodiimide) (0.52 g, 2.5 mmol), 1,4-phenylenediamine (0.11 g, 1 mmol) and (n-Bu<sub>4</sub>N)<sub>2</sub>[Mo<sub>6</sub>O<sub>19</sub>] (3.3 g, 2.4 mmol) was dissolved in DMSO (15 mL). This was stirred and heated to 60 °C for 12 hours. The solution was filtered into diethyl ether (50 mL), producing an oily precipitate. This was washed with several portions of diethyl ether, producing a hard dark red solid. Recrystallization from hot acetonitrile afforded **3** as an orange-brown solid (1.135 g, mmol, 41%). NMR (500 MHz, CD<sub>3</sub>CN): δ<sub>H</sub> 7.14 (s, 4H, ArH-ortho/meta) 3.10 (*pt*, *J* = 8.6 Hz, 32H), 1.61 (quin, *J* = 8.0 Hz, 32H), 1.36 (*sex*, *J* = 7.4 Hz, 32H), 0.97 (*t*, *J* = 7.4 Hz, 48H). δ<sub>C</sub> (125 MHz, CD<sub>3</sub>CN); 117.89, 58.92, 23.94, 19.94, 13.42, 0.90. Anal. Calcd (found) % for C<sub>70</sub>H<sub>144</sub>Mo<sub>12</sub>N<sub>6</sub>O<sub>36</sub>: C, 30.06 (29.95); H, 5.19 (5.37); N, 3.00 (3.11). *m/z* = 691.3 [Mo<sub>12</sub>O<sub>36</sub>N<sub>2</sub>C<sub>6</sub>H<sub>4</sub>(Bu<sub>4</sub>N)]<sup>3-</sup>. FTIR (ATR)/cm<sup>-1</sup>; 975 (Mo=N), 946 (Mo=O). UV-Vis (MeCN) λ, nm (ε, M<sup>-1</sup> cm<sup>-1</sup>): 272 (84.6 × 10<sup>3</sup>), 425 (69 × 10<sup>3</sup>).

**Synthesis of (n-Bu<sub>4</sub>N)<sub>4</sub>[1,4-(Mo<sub>6</sub>O<sub>18</sub>N)<sub>2</sub>(C<sub>6</sub>Me<sub>4</sub>)] (5)** A mixture of DCC (0.52 g, 2.5 mmol), *N,N,N',N'*-Tetramethyl-*p*-phenylenediamine dihydrochloride (0.164 g, 1 mmol) and (n-Bu<sub>4</sub>N)<sub>2</sub>[Mo<sub>6</sub>O<sub>19</sub>] (3.3 g, 2.4 mmol) was dissolved in DMSO (15 mL). This was then stirred and heated slowly to 60 °C and left to reflux for 12 hours under argon gas. The solution was filtered into diethyl ether (50 mL). The oily product was then washed again to remove 1,3-dicyclohexylurea (DCU) and other insoluble materials, further drying under vacuum and washings were necessary to get a solid product. This left a hard dark red solid which was recrystallized in hot acetone and left at room temperature for a few days to afford a dark brown solid (0.817 g, 0.286 mmol, 35.8 %) NMR (500 MHz, CD<sub>3</sub>CN): δ<sub>H</sub> 3.10 (*pt*, *J* = 8.6 Hz, 32H), 2.45 (s, 12H, ArMe-ortho/meta), 1.61 (quin, *J* = 8.0 Hz, 32H), 1.36 (*sex*, *J* = 7.4 Hz, 32H), 0.97 (*t*, *J* = 7.4 Hz, 48H). Anal. Calcd (found) % for C<sub>74</sub>H<sub>156</sub>Mo<sub>12</sub>N<sub>6</sub>O<sub>36</sub>: C, 31.10 (31.24); H, 5.50 (5.62); N, 2.94 (3.05). *m/z* = 472.2 [Mo<sub>12</sub>O<sub>36</sub>C<sub>10</sub>H<sub>12</sub>N<sub>2</sub>]<sup>4-</sup>, 709.7 [Mo<sub>12</sub>O<sub>36</sub>C<sub>26</sub>H<sub>48</sub>N<sub>3</sub>]<sup>3-</sup>, 1185.7 [Mo<sub>12</sub>O<sub>36</sub>C<sub>42</sub>H<sub>84</sub>N<sub>4</sub>]. FTIR (ATR)/cm<sup>-1</sup>; 945 (Mo-O), 972 (Mo-N). UV-Vis (MeCN) λ (ε): 440 (61.7 × 10<sup>3</sup>), 214 (75.7 × 10<sup>3</sup>).

**Synthesis of (n-Bu<sub>4</sub>N)<sub>4</sub>[1,3-(Mo<sub>6</sub>O<sub>18</sub>N)<sub>2</sub>(C<sub>6</sub>H<sub>4</sub>)] (6).** A mixture of DCC (0.52 g, 2.5 mmol), 1,3-phenylenediamine (0.11 g, 1 mmol) and (n-Bu<sub>4</sub>N)<sub>2</sub>[Mo<sub>6</sub>O<sub>19</sub>] (3.3 g, 2.4 mmol) was dissolved in DMSO (15 mL). This was then stirred and heated slowly at 60 °C for 17 hours. The solution was filtered into diethyl ether (50 mL), producing an oily precipitate. This was triturated several times with diethyl ether and dried *in vacuo* between washings, until a hard dark red solid was obtained. Recrystallization from hot acetone afforded **4** as an orange-brown solid (1.914 g, 0.68 mmol, 68 %) NMR (500 MHz, CD<sub>3</sub>CN): δ<sub>H</sub> 7.44 (*t*, 1H, ArH-meta), 7.15 (*dd*, 2H, ArH-ortho), 6.92 (*s*, 1H, ArH-para) 3.10 (*pt*, *J* = 8.6 Hz, 32H), 1.61 (quin, *J* = 8.0 Hz, 32H), 1.36 (*sex*, *J* = 7.4 Hz, 32H), 0.97 (*t*, *J* = 7.4 Hz, 48H). δ<sub>C</sub> (125 MHz, CD<sub>3</sub>CN); 118.06, 58.92, 24.01, 19.97, 13.47, 0.896. Anal. Calcd (found) % for C<sub>70</sub>H<sub>144</sub>Mo<sub>12</sub>N<sub>6</sub>O<sub>36</sub>: C, 30.06 (30.07); H, 5.19 (5.21); N, 3.00 (3.06). *m/z* = 691.7 [Mo<sub>12</sub>O<sub>36</sub>N<sub>2</sub>C<sub>6</sub>H<sub>4</sub>(Bu<sub>4</sub>N)]<sup>3-</sup>. FTIR (ATR)/cm<sup>-1</sup>; 976 (Mo=N), 945 (Mo=O). UV-Vis (MeCN) λ, nm (ε, M<sup>-1</sup> cm<sup>-1</sup>): 258 (81.6 × 10<sup>3</sup>), 348 (55.5 × 10<sup>3</sup>).

**Synthesis of (n-Bu<sub>4</sub>N)<sub>4</sub>[1,3-(Mo<sub>6</sub>O<sub>18</sub>)<sub>2</sub>(C<sub>6</sub>HMe<sub>3</sub>)] (7).** A mixture of DCC (0.52 g, 2.5 mmol), 2,4,6-trimethyl-m-phenylenediamine (0.152 g, 1 mmol) and (n-Bu<sub>4</sub>N)<sub>2</sub>[Mo<sub>6</sub>O<sub>19</sub>] (3.3 g, 2.4 mmol) was dissolved in DMSO (15 mL). This was then stirred and heated slowly to 60 °C and left to reflux for 12 hours under argon gas. The solution was filtered into diethyl ether (50 mL). The oily product was then washed again to remove DCU and other insoluble materials, further drying under vacuum and washings were necessary to get a solid product. This left a hard dark red solid which was recrystallized in hot acetonitrile. Further addition of diethyl ether was required to recrystallize afford an orange solid (1.156 g, 0.407 mmol, 40.7 %) NMR (500 MHz, CD<sub>3</sub>CN): δ<sub>H</sub> 6.92 (s, 1H, ArH-meta), 3.10 (pt, *J* = 8.6 Hz, 32H), 2.93 (s, 6H, ArMe-o ortho/para), 2.63 (s, 3H, ArMe-ortho), 1.62 (quin, *J* = 8.0 Hz, 32H), 1.37 (sex, *J* = 7.4 Hz, 32H), 0.96 (t, *J* = 7.4 Hz, 48H). Anal. Calcd (found) % for C<sub>73</sub>H<sub>154</sub>Mo<sub>12</sub>N<sub>8</sub>O<sub>36</sub>: C, 30.83 (30.95); H, 5.46 (5.57); N, 2.96 (3.03). FTIR (ATR)/cm<sup>-1</sup>; 947 (Mo-O), 974 (Mo-N). UV-Vis (MeCN) λ (ε): 361 (49.1 × 10<sup>3</sup>), 257 (68.0 × 10<sup>3</sup>).

## 2. X-ray Crystallographic Details

**Table S1** X-ray Crystallographic Data and Refinement Details for **4•2MeCN**

|                                                                                                |                                                                                  |
|------------------------------------------------------------------------------------------------|----------------------------------------------------------------------------------|
| Formula                                                                                        | C <sub>74</sub> H <sub>154</sub> Mo <sub>12</sub> N <sub>8</sub> O <sub>36</sub> |
| <i>M</i>                                                                                       | 2883.32                                                                          |
| cryst syst                                                                                     | Triclinic                                                                        |
| space group                                                                                    | <i>P</i> -1                                                                      |
| <i>a</i> /Å                                                                                    | 11.5075(4)                                                                       |
| <i>b</i> /Å                                                                                    | 12.0506(6)                                                                       |
| <i>c</i> /Å                                                                                    | 19.3113(10)                                                                      |
| <i>α</i> /deg                                                                                  | 76.208(5)                                                                        |
| <i>β</i> /deg                                                                                  | 84.833(4)                                                                        |
| <i>γ</i> /deg                                                                                  | 85.902(3)                                                                        |
| <i>U</i> /Å <sup>3</sup>                                                                       | 2586.7(2)                                                                        |
| <i>Z</i>                                                                                       | 1                                                                                |
| <i>T</i> /K                                                                                    | 140(2)                                                                           |
| <i>μ</i> /mm <sup>-1</sup>                                                                     | 1.480                                                                            |
| Cryst. size/mm                                                                                 | 0.20 × 0.20 × 0.05                                                               |
| Cryst. description                                                                             | Orange plate                                                                     |
| <i>λ</i> /Å                                                                                    | 0.71073                                                                          |
| No. reflns collected                                                                           | 22102                                                                            |
| No. of indep. reflns ( <i>R</i> <sub>int</sub> )                                               | 11733 [ <i>R</i> (int) = 0.1114]                                                 |
| <i>θ</i> <sub>max</sub> /deg (completeness)                                                    | 25.00 (98.8%)                                                                    |
| Reflections with <i>I</i> > 2σ( <i>I</i> )                                                     | 4619                                                                             |
| Goodness-of-fit on <i>F</i> <sup>2</sup>                                                       | 0.966                                                                            |
| final <i>R</i> <sub>1</sub> , <i>wR</i> <sub>2</sub> [ <i>I</i> > 2σ( <i>I</i> )] <sup>a</sup> | <i>R</i> 1 = 0.0877, <i>wR</i> 2 = 0.1432                                        |
| (all data)                                                                                     | <i>R</i> 1 = 0.2043, <i>wR</i> 2 = 0.1946                                        |
| Peak and hole/e Å <sup>-3</sup>                                                                | 1.832 and -1.273                                                                 |

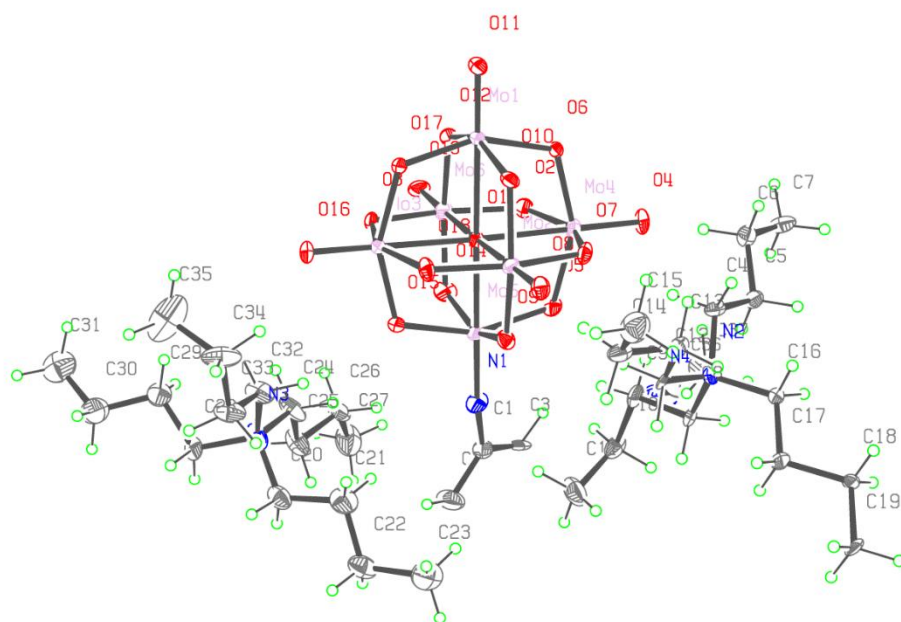

**Figure S1** The asymmetric unit of **4•2MeCN**. Thermal ellipsoids are at the 30% probability level. Mo atoms are coloured purple; C, grey; O, red; N, blue; H atoms are represented by green circles of arbitrary radii.

### 3. Additional Electronic Absorption Spectra

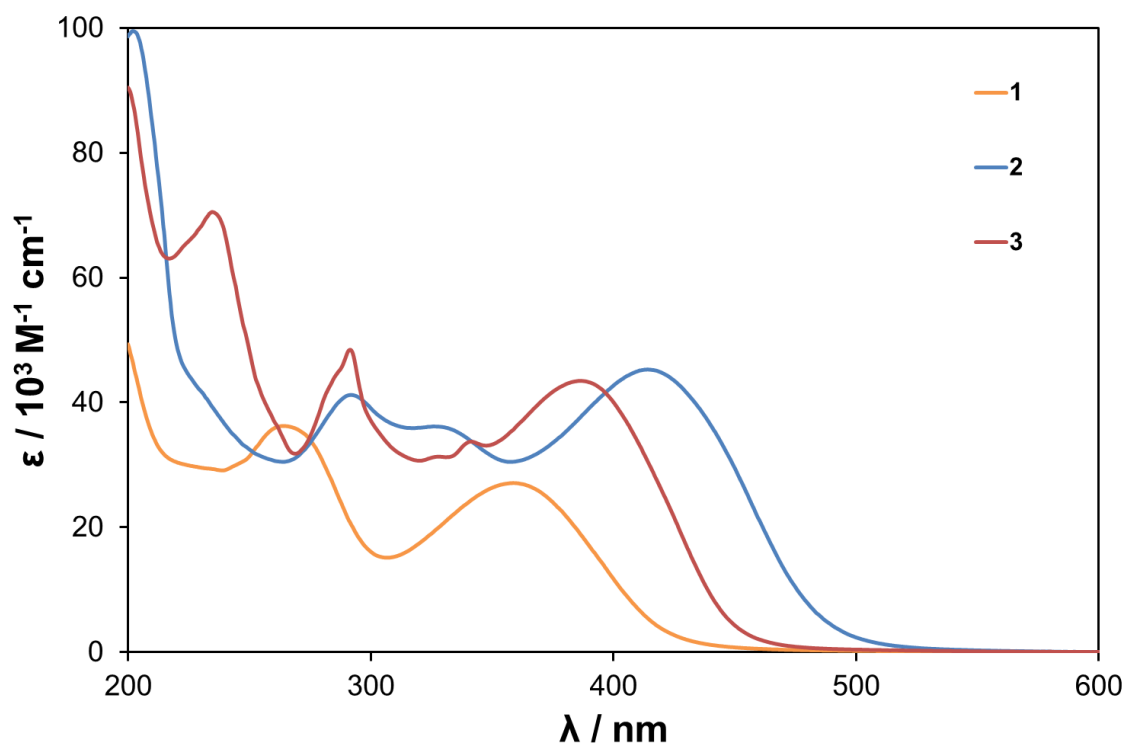

**Figure S2** UV-vis absorption spectra of dipolar hexamolybdate derivatives **1** to **3**.

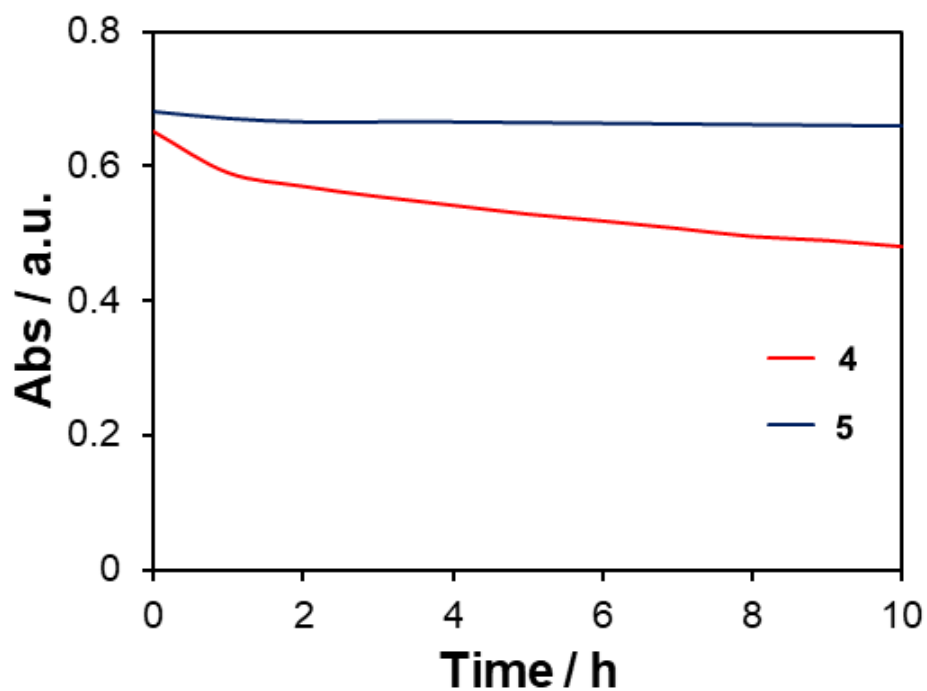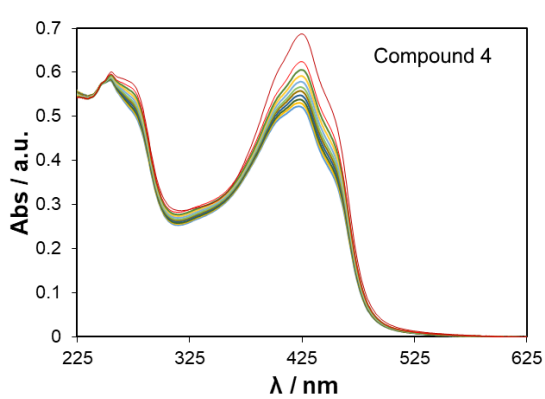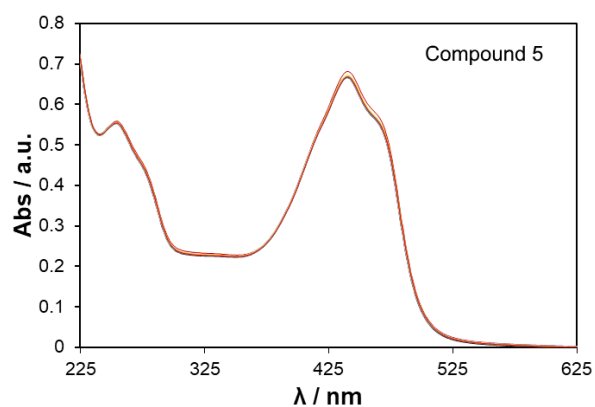

**Figure S3 Top:** Declines in UV-vis absorbance over time for compounds **4** and **5**, monitored over 10 hours after adding a single drop of water to a 3 mL UV-vis cuvette. **Bottom:** Evolution of the underlying spectra over 10 hours after addition of water. The concentrations of **4** and **5** are *ca.*  $10^{-5}$  M.

#### 4. Cyclic Voltammograms and Deconvolution of Differential Pulsed Voltammetry

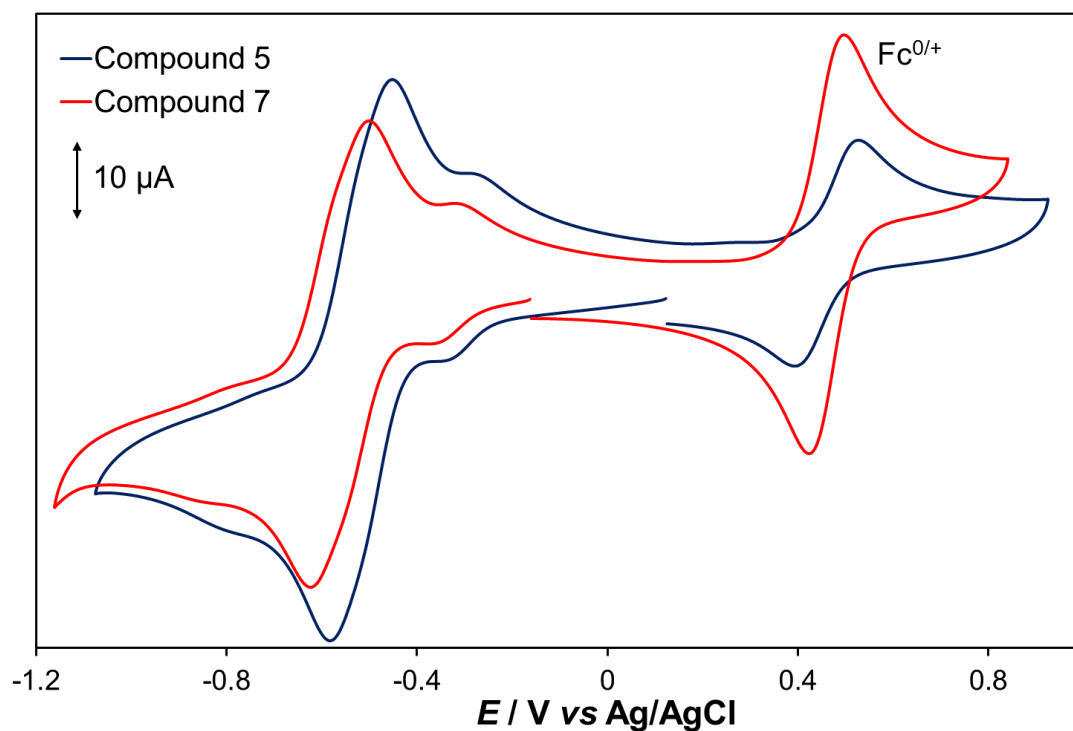

**Figure S4** Cyclic voltammograms of **5** and **7** recorded at  $100 \text{ mV s}^{-1}$  in  $0.1 \text{ M } [\text{NBu}_4][\text{BF}_4]$  in acetonitrile. The small peaks close to  $-0.4 \text{ V}$  are from  $[\text{Mo}_6\text{O}_{19}]^{2-}$  impurities.

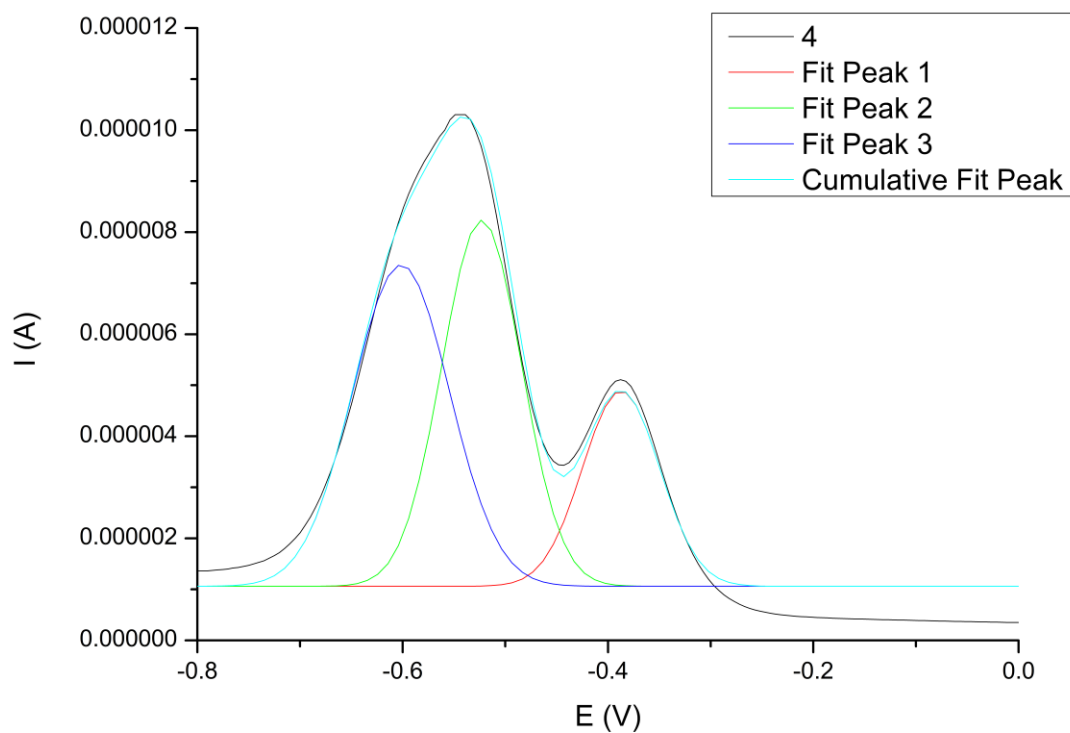

**Figure S5** Deconvolution of the differential pulsed voltammogram of **4**.

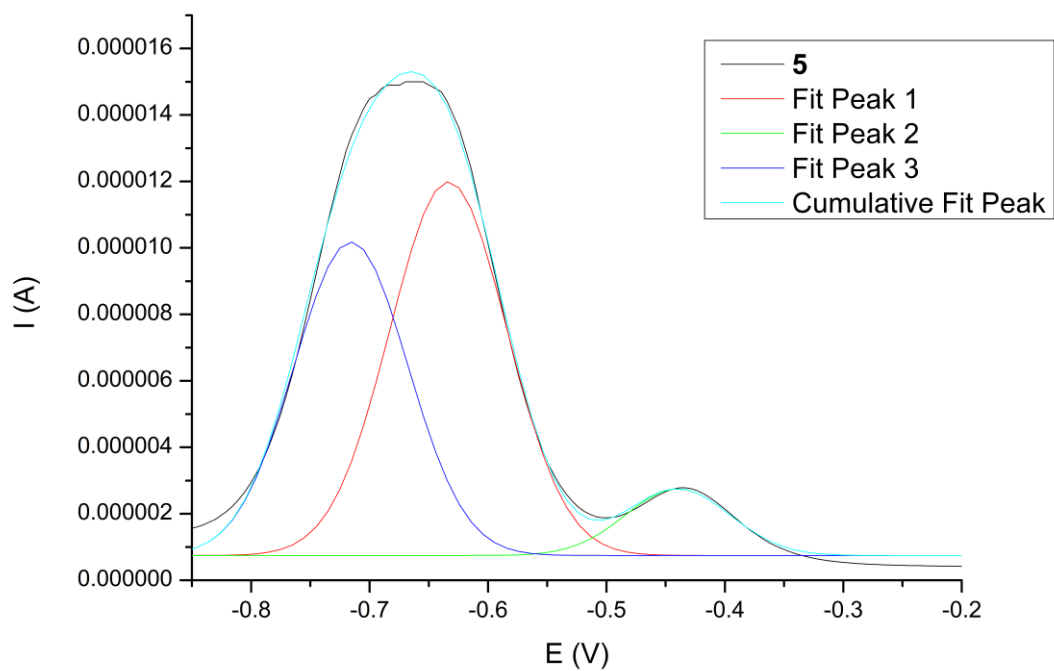

**Figure S6** Deconvolution of the differential pulsed voltammogram of **5**

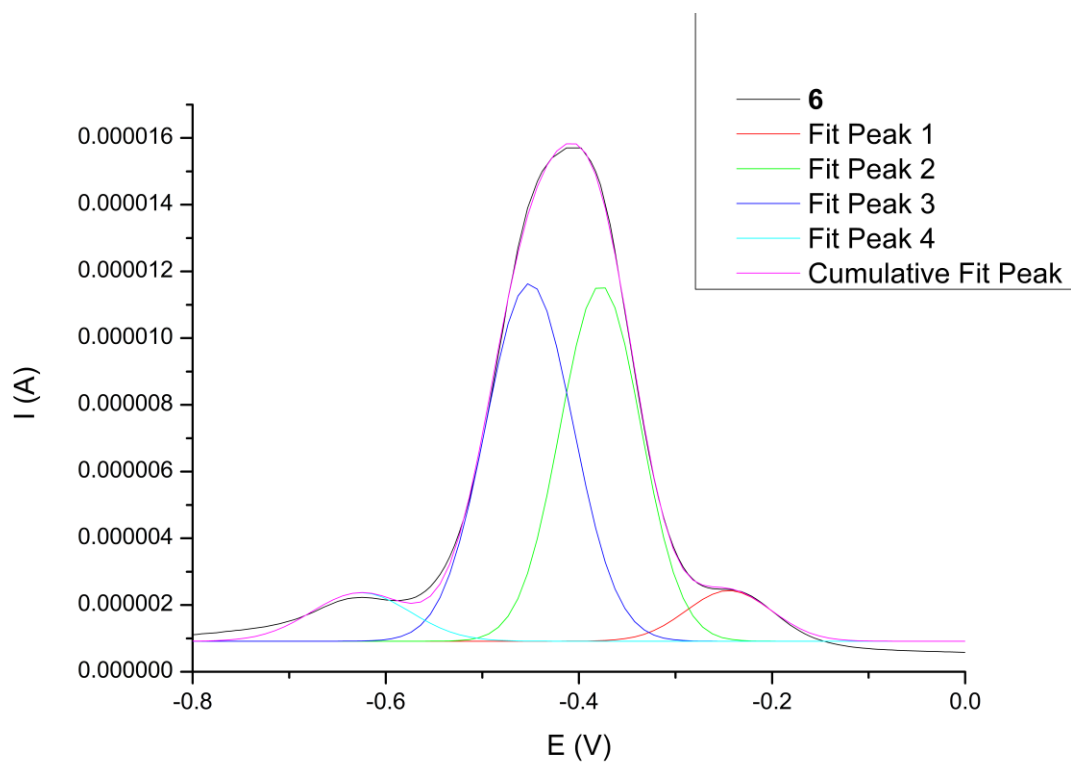

**Figure S7** Deconvolution of the differential pulsed voltammogram of **6**

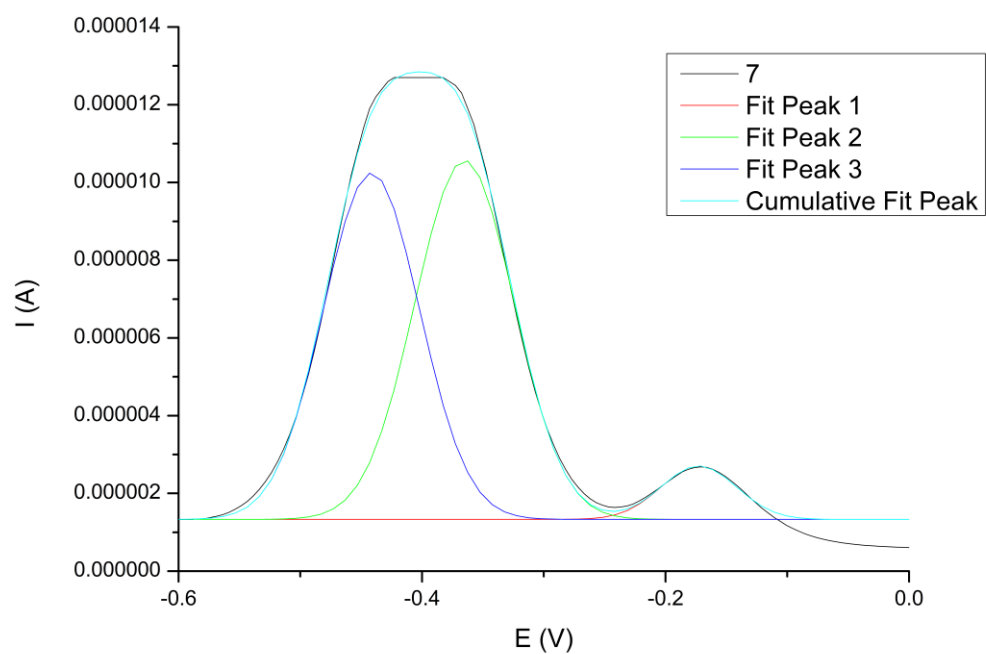

**Figure S8** Deconvolution of the differential pulsed voltammogram of **7**.

### 3. Z-Scan Data

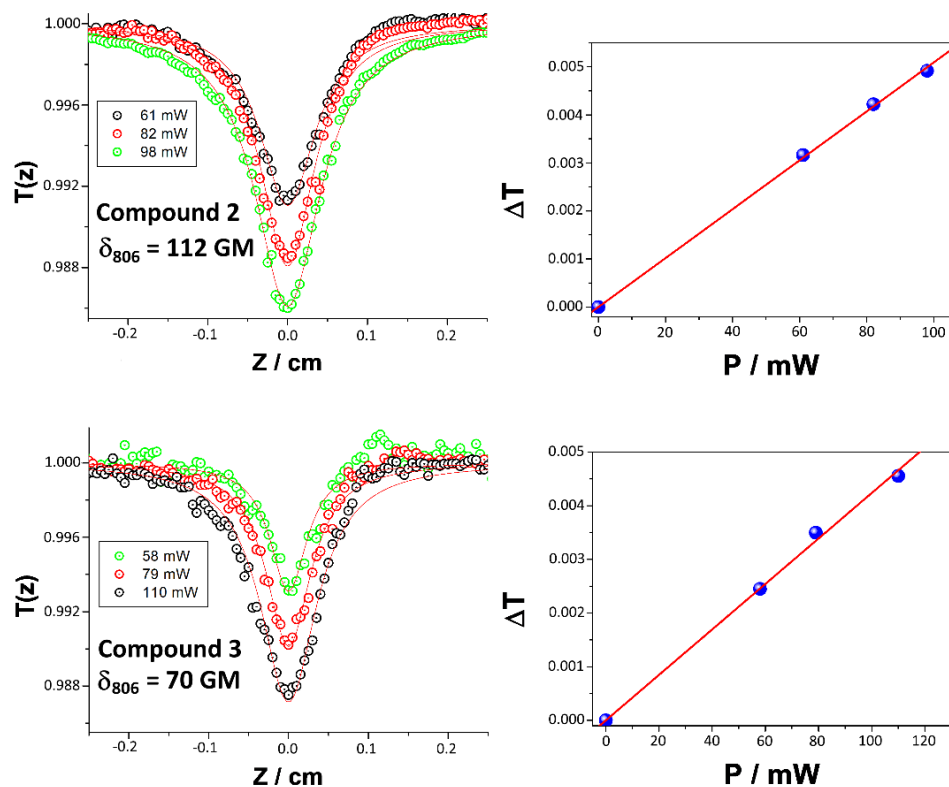

**Figure S9** Z-scan data curves (circles) and fits (solid lines) for dipolar compounds 2 and 3 (left) and corresponding plots of power versus change in transmittance (right). The non-linear absorbance of compound 1 was too weak to measure accurately.

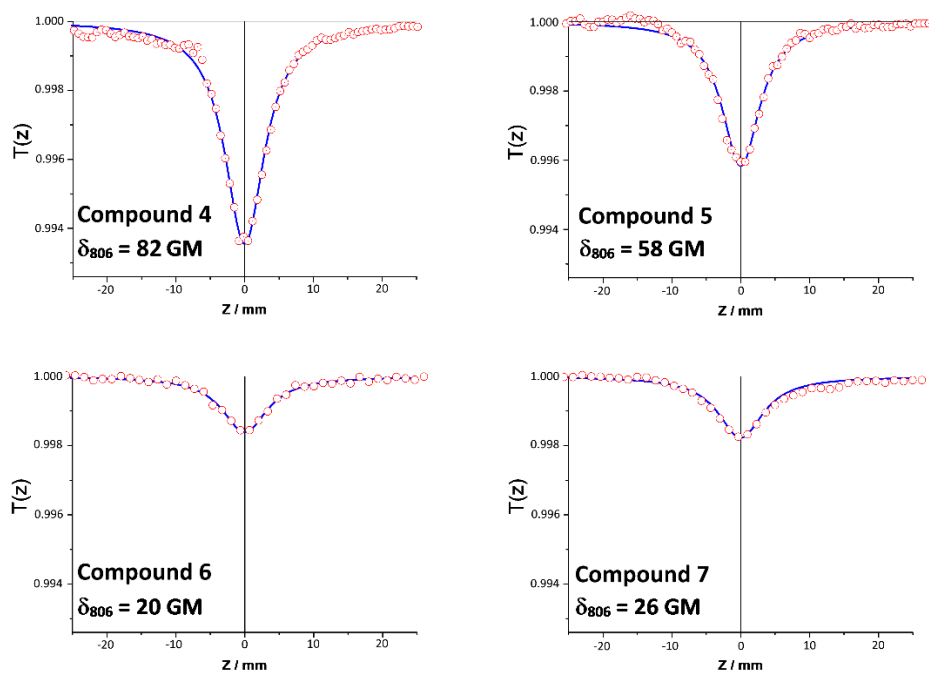

**Figure S10** Z-scan data curves (circles) and fits (solid lines) for centrosymmetric compounds 4 to 7.



#### 4. Additional Computational Data

**Table S2:** Effects of the exchange-correlation functional and basis set on selected equilibrium bond lengths (Å) and angles (°) of compound **4**. Calculations were performed in the gas phase.

| Functional /Basis set        | Mo-N-C | Mo-N  | N-C  | Mo-O <sub>c</sub> <sup>a</sup> |
|------------------------------|--------|-------|------|--------------------------------|
| BP86/6-31G/SSD               | 180    | 1.78  | 1.37 | 2.27                           |
| μB97XD/6-31G/SDD             | 180    | 1.73  | 1.38 | 2.26                           |
| BP86/def2TZVP                | 180    | 1.77  | 1.36 | 2.23                           |
| BP86/6-31G/LanL2DZ           | 180    | 1.79  | 1.37 | 2.26                           |
| ωB97XD/6-311+G(d,p) /LanL2DZ | 172    | 1.73  | 1.37 | 2.23                           |
| ωB97XD/6-311+G(d,p) /LanL2TZ | 174.6  | 1.73  | 1.37 | 2.24                           |
| <b>Exp.</b>                  | 160.8  | 1.714 | 1.43 | 2.21                           |

<sup>a</sup>Central oxygen

**Table S3.** Selected, calculated geometric parameters for **2** and **3** at the ωB97XD/6-311+G(d,p) /LanL2DZ level of theory.

| Compound | Mo≡N-C | Mo-N | N-C  | Mo-O <sub>c</sub> <sup>a</sup> | Mo=O |
|----------|--------|------|------|--------------------------------|------|
| <b>2</b> | 154.2  | 1.76 | 1.36 | 2.18                           | 1.69 |
| <b>3</b> | 158.7  | 1.79 | 1.34 | 2.19                           | 1.71 |

<sup>a</sup>Central oxygen

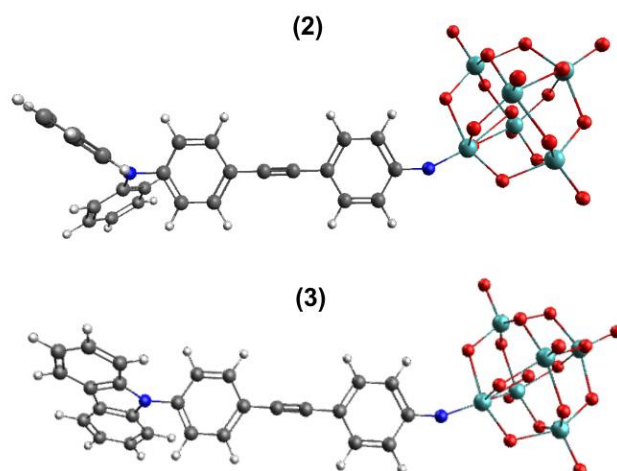

**Figure S11:** Calculated geometries of **2** and **3** at the ωB97XD/6-311+G(d,p) /LanL2DZ level of theory.

**Table S4:** Electronic transitions of **2** and **3** calculated at the the  $\omega$ B97XD/6-311+G(d,p) /LanL2DZ level of theory.

| Compound                  | Experimental                       |                              | Calculated                         |                              |          |                           |          |
|---------------------------|------------------------------------|------------------------------|------------------------------------|------------------------------|----------|---------------------------|----------|
|                           | $\lambda_{\text{max}} / \text{nm}$ | $E_{\text{max}} / \text{eV}$ | $\lambda_{\text{max}} / \text{nm}$ | $E_{\text{max}} / \text{eV}$ | $f_{os}$ | Transition                | Contr. % |
| <b>2</b>                  | 414                                | 2.98                         | 444                                | 2.789                        | 0.101    | HOMO $\rightarrow$ LUMO+1 | 15       |
|                           |                                    |                              |                                    |                              |          | HOMO $\rightarrow$ LUMO+6 | 13       |
|                           |                                    |                              |                                    |                              |          | HOMO $\rightarrow$ LUMO+7 | 6        |
|                           |                                    |                              | HOMO $\rightarrow$ LUMO+10         | 13                           |          |                           |          |
|                           |                                    |                              | 363                                | 3.420                        | 2.055    | HOMO-1 $\rightarrow$ LUMO | 65       |
| HOMO-2 $\rightarrow$ LUMO | 11                                 |                              |                                    |                              |          |                           |          |
| <b>3</b>                  | 385                                | 3.20                         | 382                                | 3.25                         | 1.889    | HOMO-1 $\rightarrow$ LUMO | 80       |

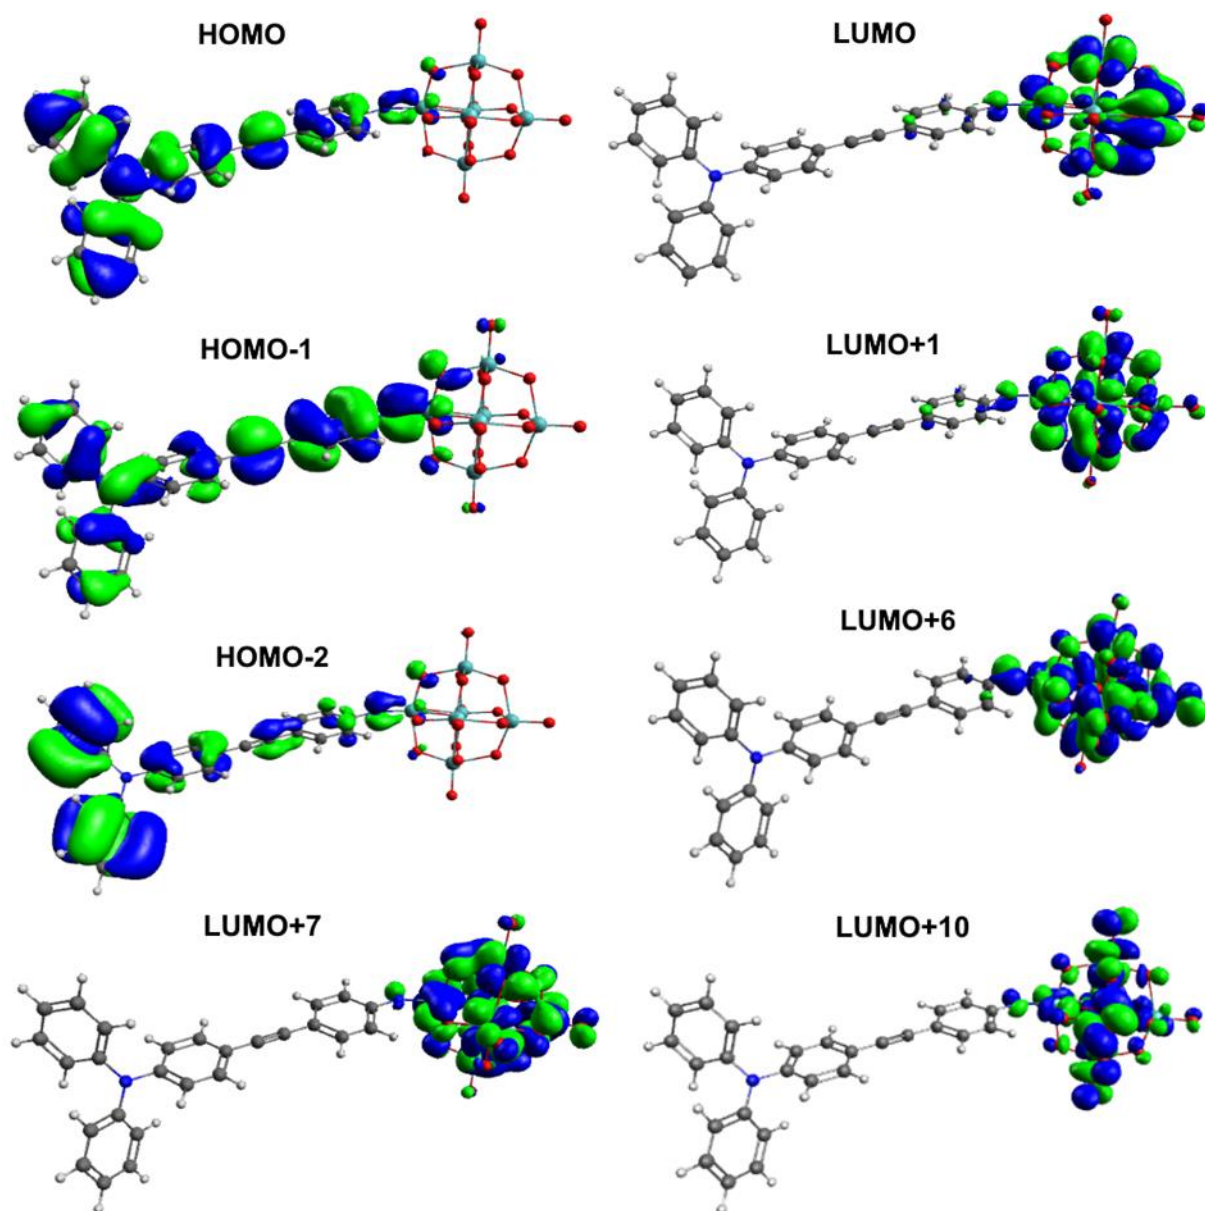

**Figure S12.** Solvent phase frontier orbitals involved in the significant UV-vis transitions of 2.

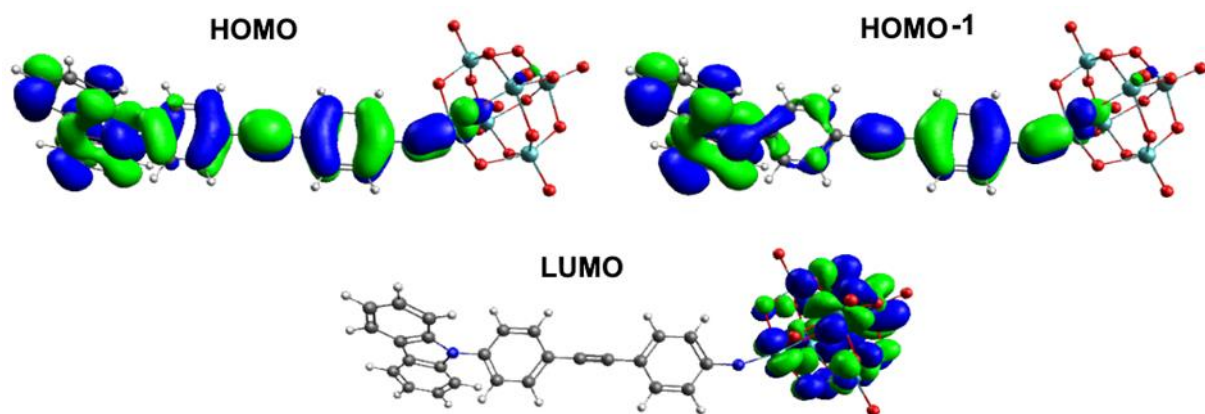

**Figure S13.** Solvent phase frontier orbitals involved in the significant UV-vis transitions of 3.

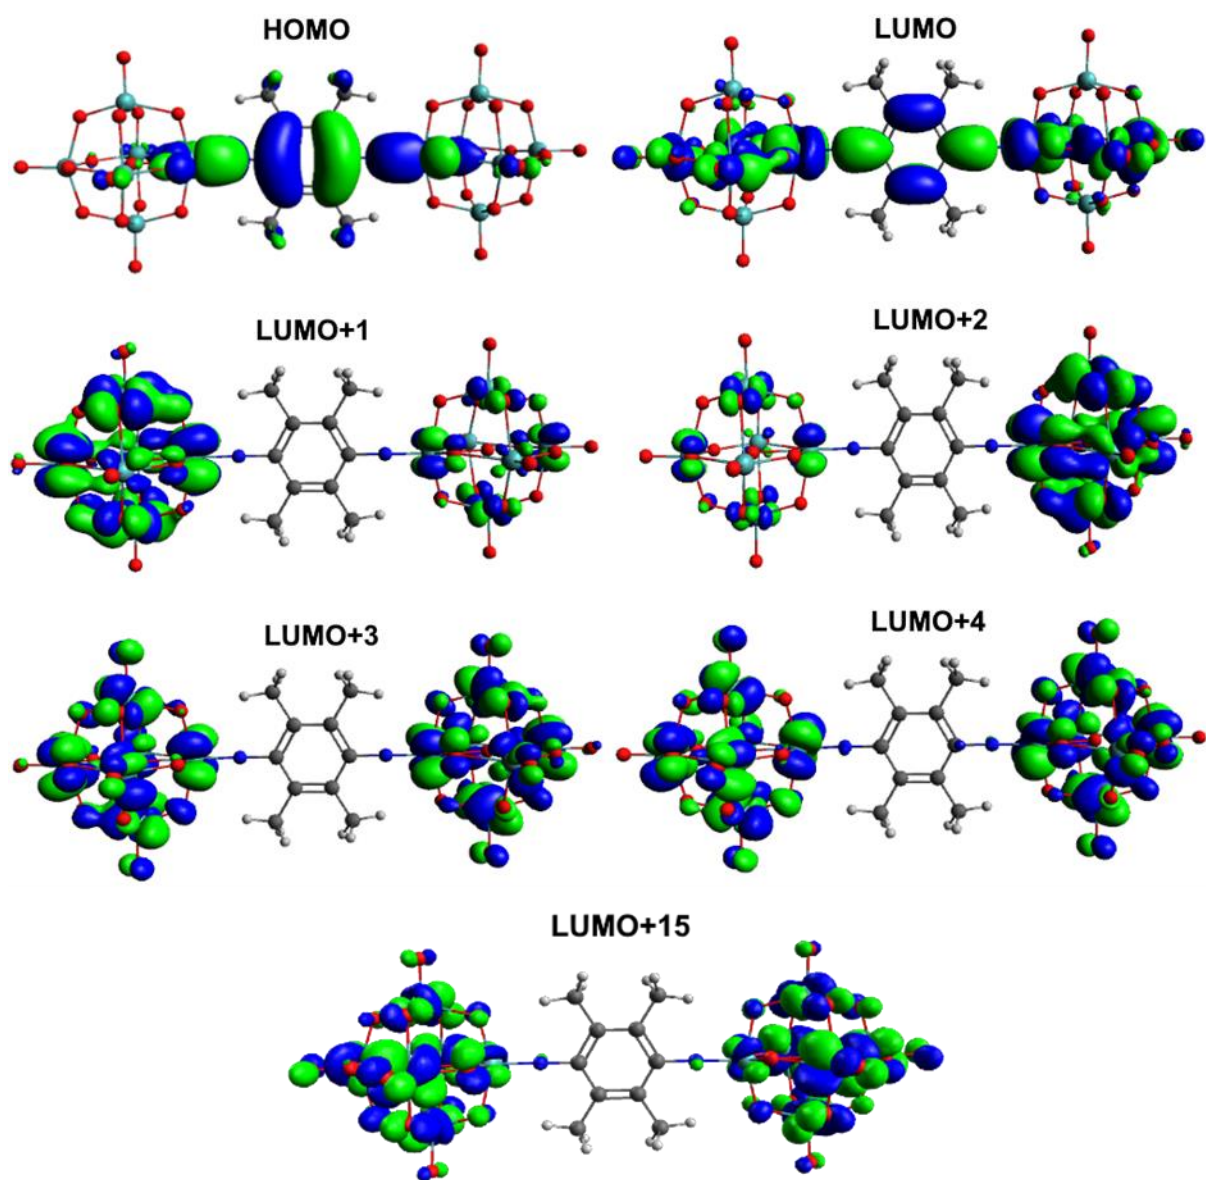

**Figure S14.** Solvent phase frontier orbitals involved in the significant UV-vis transitions of **5**.

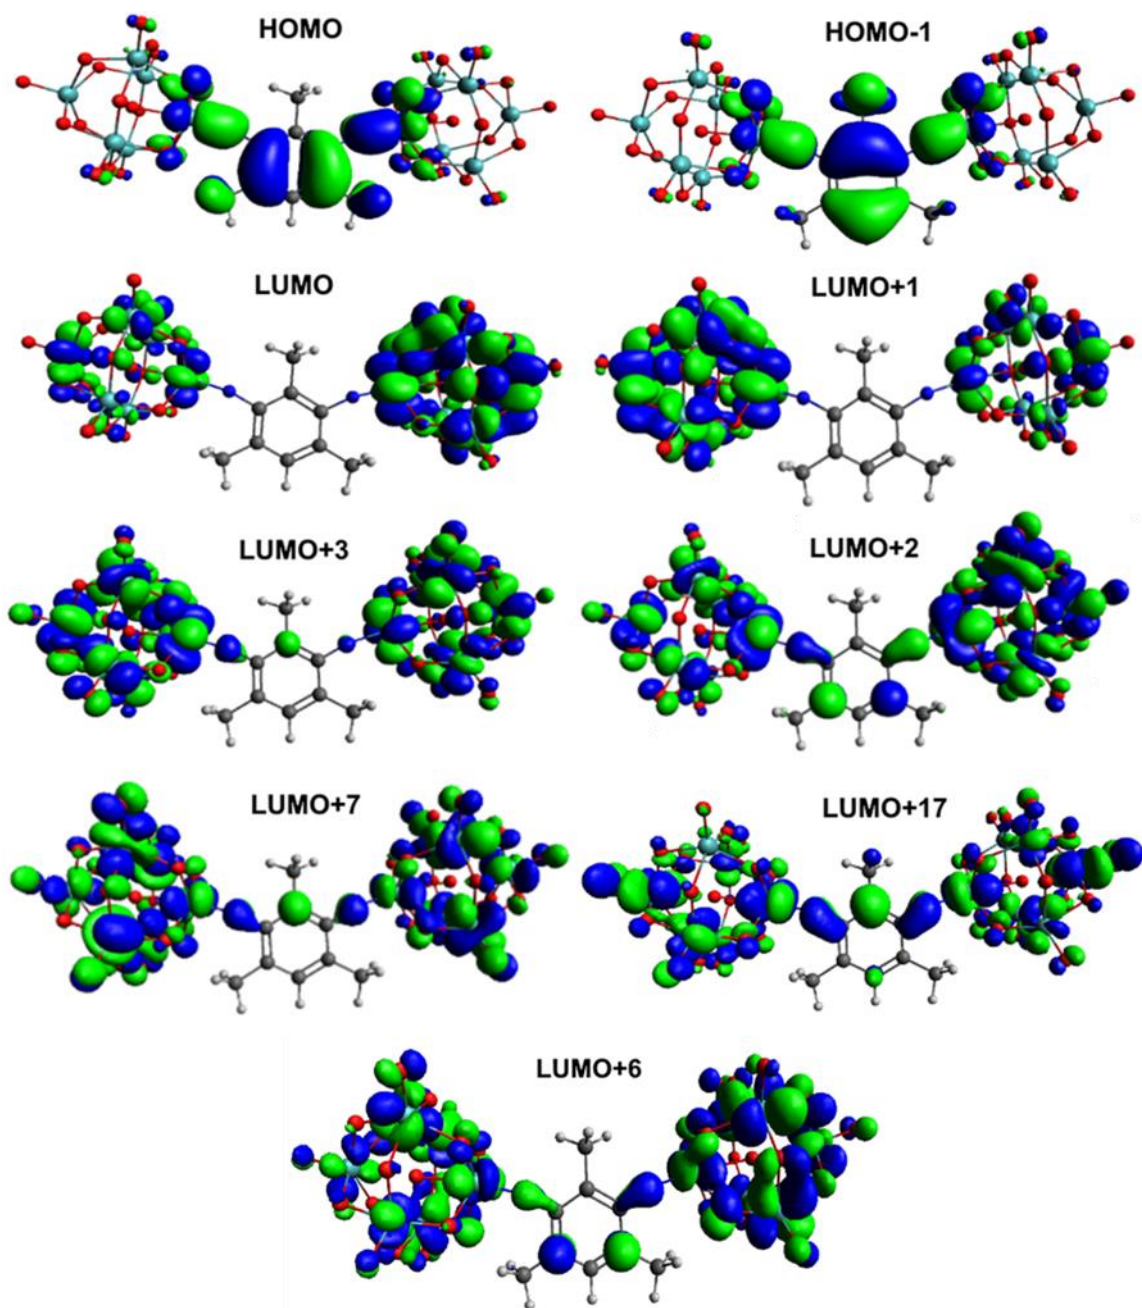

**Figure S15.** Solvent phase frontier orbitals involved in the significant UV-vis transitions of **7**.

**Table S5.** Experimental and Calculated Electronic Transitions of Compounds **7** at the  $\omega$ B97X-D and CAM-B3LYP/6-311+G(d,p)/LanL2DZ level of theory.

|          |                                    | $\omega$ B97X-D      |                            | CAM-B3LYP            |                            |          |                            |         |
|----------|------------------------------------|----------------------|----------------------------|----------------------|----------------------------|----------|----------------------------|---------|
|          | Exp.<br>$\lambda_{\max}/\text{nm}$ | $E_{\max}/\text{eV}$ | $\lambda_{\max}/\text{nm}$ | $E_{\max}/\text{eV}$ | $\lambda_{\max}/\text{nm}$ | $f_{os}$ | Transition                 | Contr.  |
| <b>7</b> | 361                                | 3.3826               | 366.54                     | 3.2725               | 378.86                     | 1.2952   | HOMO $\rightarrow$ LUMO+1  | 0.12132 |
|          |                                    |                      |                            |                      |                            |          | HOMO $\rightarrow$ LUMO+6  | 0.30076 |
|          |                                    |                      |                            |                      |                            |          | HOMO $\rightarrow$ LUMO+9  | 0.20317 |
|          |                                    | 3.4230               | 362.21                     | 3.3276               | 372.60                     | 0.1104   | HOMO $\rightarrow$ LUMO    | 0.13772 |
|          |                                    |                      |                            |                      |                            |          | HOMO $\rightarrow$ LUMO+3  | 0.12925 |
|          |                                    |                      |                            |                      |                            |          | HOMO $\rightarrow$ LUMO+7  | 0.31049 |
|          |                                    |                      |                            |                      |                            |          | HOMO $\rightarrow$ LUMO+16 | 0.24494 |
